# Supplementary material for: Custom-made holey graphene via scanning probe block co-polymer lithography
Source: Royal Society of Chemistry journal article supplement (doi:10.1039/d1na00769f), 2022-01-01
Supplement: d1na00769f1.pdf [file d1na00769f1.pdf]

## Supplementary Information

### Custom-made Holey Graphene via Scanning Probe Block Co-polymer Lithography

Samar A. Alsudir<sup>a</sup>, Roa S. Fardous<sup>a</sup>, Shahla Alsoughayer<sup>b</sup>, Abdulaziz M. Almalik<sup>a,b</sup>, Edreese H. Alsharaeh<sup>c</sup>, Ali H. Alhasan<sup>\*c,d</sup>

<sup>a</sup>National Center for Pharmaceutical Technology, Life science and Environmental Research Institute, King Abdulaziz City for Science and Technology (KACST), P.O. Box 6086, Riyadh 11461, Saudi Arabia

<sup>b</sup>KACST-BWH/Harvard Centre of Excellence for Biomedicine, Joint Centers of Excellence Program, King Abdulaziz City for Science and Technology (KACST), P.O. Box 6086, Riyadh 11461, Saudi Arabia

<sup>c</sup>College of Science and General Studies, Alfaisal University, P.O. Box 50927, Riyadh 11533, Saudi Arabia

<sup>d</sup>National Center for Biotechnology, Life science and Environmental Research Institute, King Abdulaziz City for Science and Technology (KACST), P.O. Box 6086, Riyadh 11461, Saudi Arabia

\*Corresponding author: Ali H. Alhasan

Email: aalhasan@kacst.edu.sa

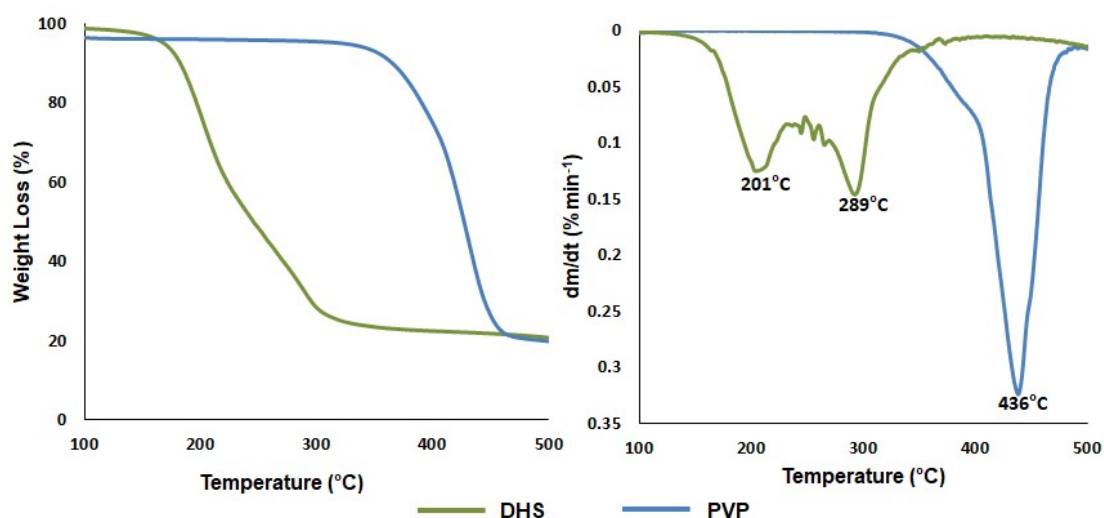

Figure S1: Graphs of thermogravimetric analysis (TGA) determining the decomposition temperatures of PVP and DHS.
