# Supplementary material for: Custom-made holey graphene via scanning probe block co-polymer lithography
Source: Royal Society of Chemistry journal article supplement (doi:10.1039/d1na00769f), 2022-01-01

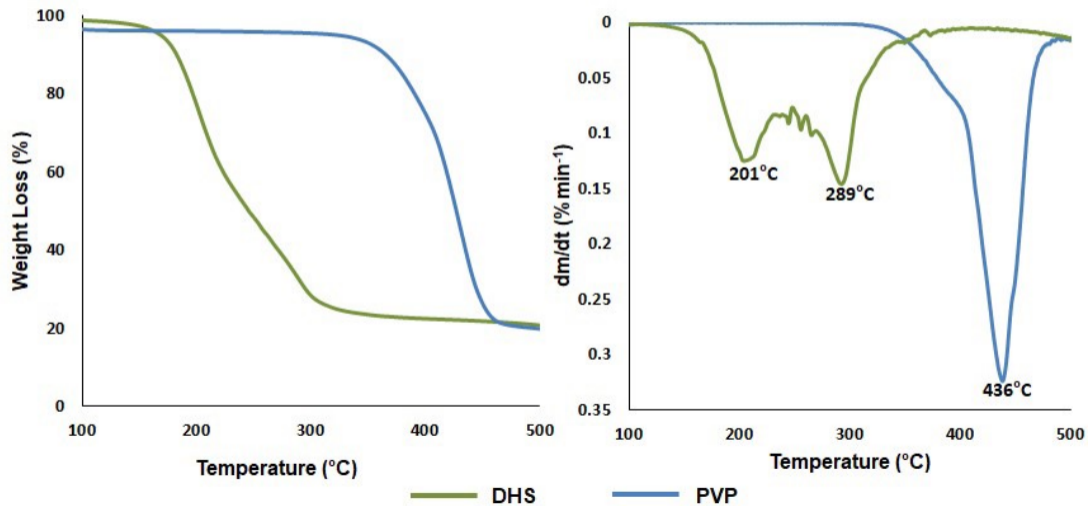

Supplement: d1na00769f3.pdf [file d1na00769f3.pdf]
